# Supplementary material
Source: PubMed Central journal article supplement (PMC6800776)
Supplement: NIHMS1040211-supplement-Supp_info.pdf [file NIHMS1040211-supplement-Supp_info.pdf]

**Supplemental Information: Lytic transglycosylases RlpA and MltC  
assist in *Vibrio cholerae* daughter cell separation**

Anna I. Weaver<sup>1,2</sup>, Valeria Jiménez-Ruiz<sup>1</sup>, Srikar R. Tallavajhala<sup>1</sup>, Brett P. Ransegnola<sup>1</sup>,  
Kimberly Q. Wong<sup>1</sup>, and Tobias Dörr<sup>1,2,3a</sup>

<sup>1</sup> Weill Institute for Cell and Molecular Biology, Cornell, University, Ithaca, NY 14853, USA

<sup>2</sup> Department of Microbiology, Cornell University, Ithaca NY 14853, USA

<sup>3</sup> Cornell Institute of Host-Microbe Interactions and Disease, Cornell University, Ithaca NY  
14853, USA

<sup>a</sup> corresponding author: [tdoerr@cornell.edu](mailto:tdoerr@cornell.edu)

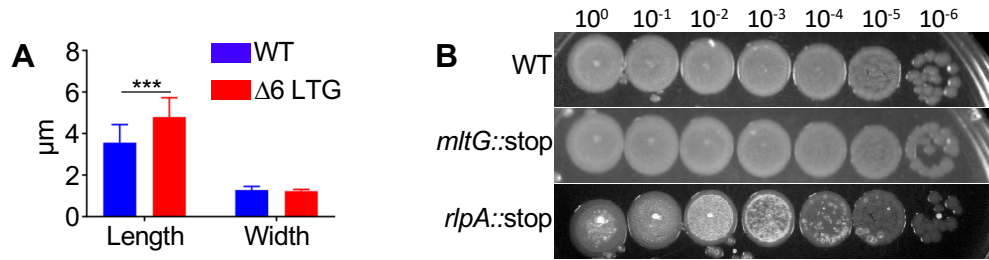

**Fig S1.  $\Delta 6$  LTG exhibits a mild morphological defect and *mltG*<sup>-</sup>, *rlpA*<sup>-</sup> exhibit no plating defects.**

**A)** Cultures of WT and  $\Delta 6$  LTG were grown in LB at 37 °C for 5 hrs and imaged on agarose pads. Dimensions of >800 cells were compared within length and within width with a Student's t-test where \*\*\* indicates  $p < 0.0001$ . **B)** Overnight cultures of WT, *rlpA::stop*, and *mltG::stop* grown in LB at 37°C were spot-plated in serial 10-fold dilutions onto LB and incubated ~18 hrs at 30°C. All data are representative of at least two biological replicates.

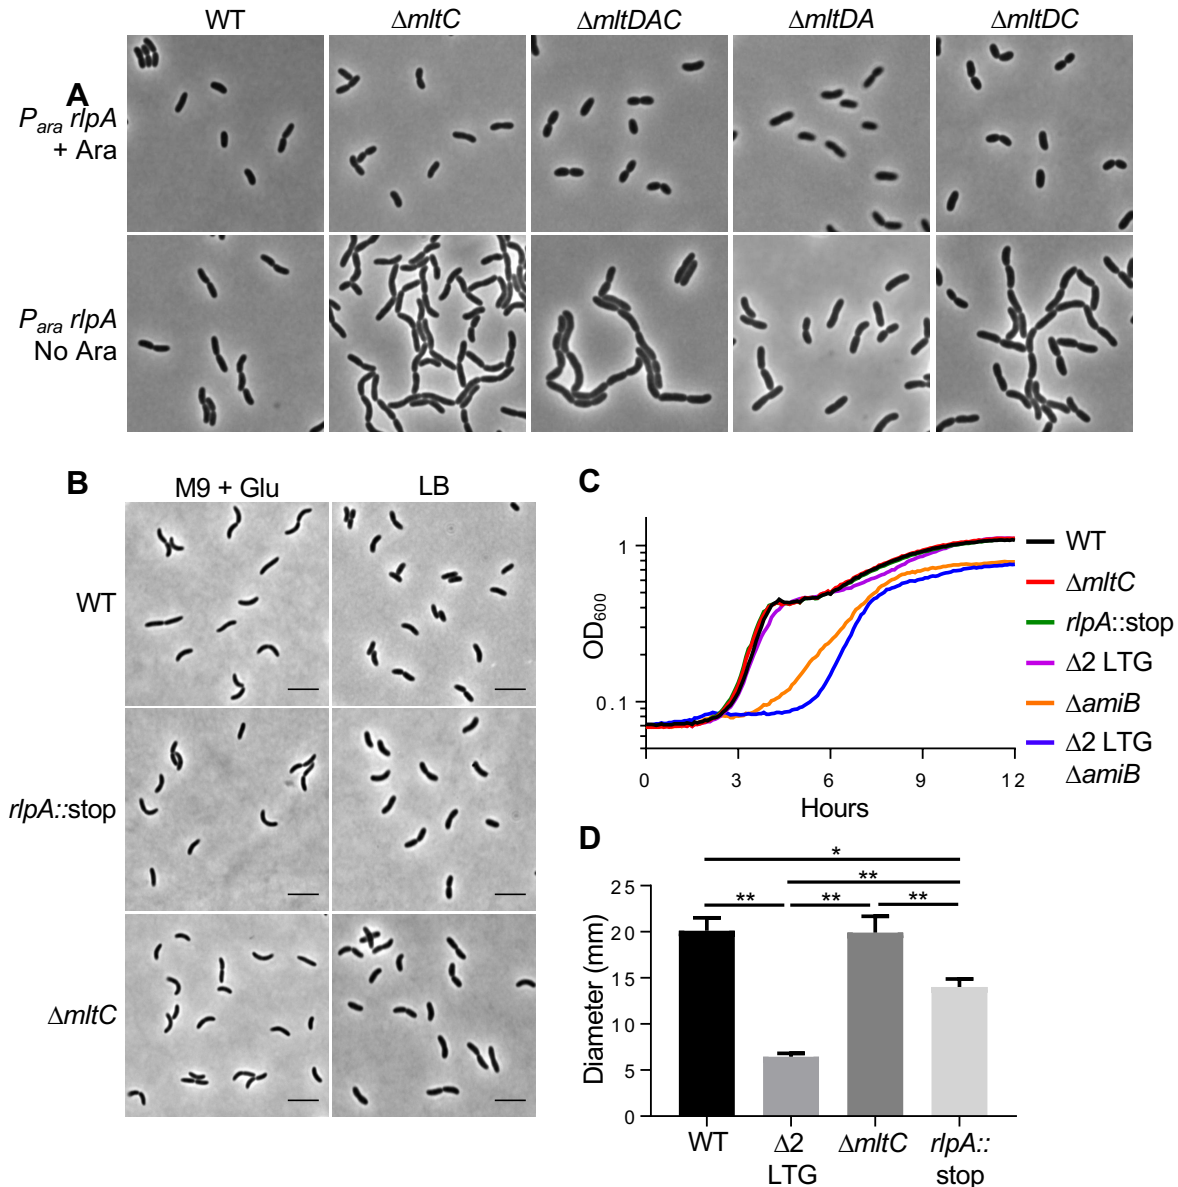

**Fig S2.  $rlpA::stop$   $\Delta mltC$  mutant exhibits motility defect but no growth defect.**

**A)** RlpA was depleted in WT,  $\Delta mltC$ ,  $\Delta mltDAC$ ,  $\Delta mltDA$ , and  $\Delta mltDC$  backgrounds by placing its native promoter under control of arabinose induction and growing in the absence or presence of arabinose. Cells were imaged on an agarose pad. **B)** WT,  $rlpA::stop$ , and  $\Delta mltC$  were grown to  $\sim OD_{600} 0.5$  in M9+0.2%Glu or LB at 37°C and imaged on agarose pads. **C)** Autolysin mutants were grown in 200  $\mu L$  LB, monitoring  $OD_{600}$ . **D)** Overnight cultures of autolysin mutants grown in LB were stabbed into 0.3% agarose LB plates and incubated at 30°C for 16 hrs before measuring the diameter of growth. Diameters of mutant strains were compared to WT by a one-way ANOVA and Tukey's test where \* indicates a  $p < 0.05$  and \*\* a  $p < 0.01$ . Error bars represent SEM of 3 independent replicates. Scale bars = 5  $\mu m$ .



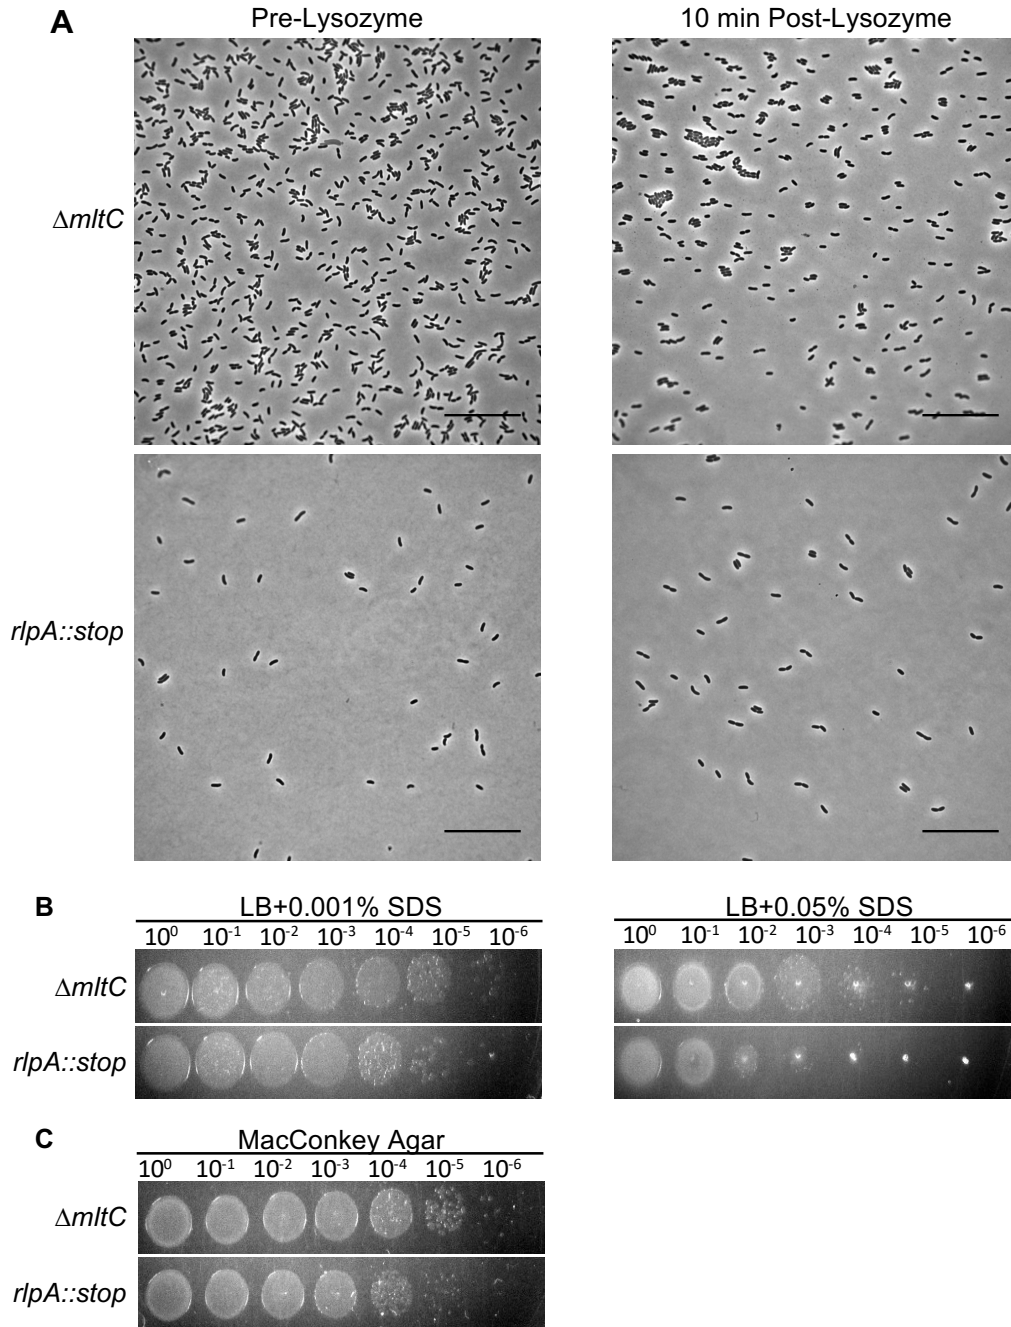

**Fig S4. Single mutants of *rlpA::stop* and  $\Delta mltC$  exhibit a mild outer membrane defect**

Exponential phase cultures of *rlpA::stop* and  $\Delta mltC$  were exposed to 5 mg mL<sup>-1</sup> lysozyme for 10 min. Scale bars = 25  $\mu$ m. Overnight cultures of *rlpA::stop* and  $\Delta mltC$  grown in LB were diluted in LB and spot-plated in 10-fold serial dilutions on **B**) LB containing SDS and on **C**) MacConkey agar and incubated at 18hrs at 30°C. All data are representative of at least two biological replicates.

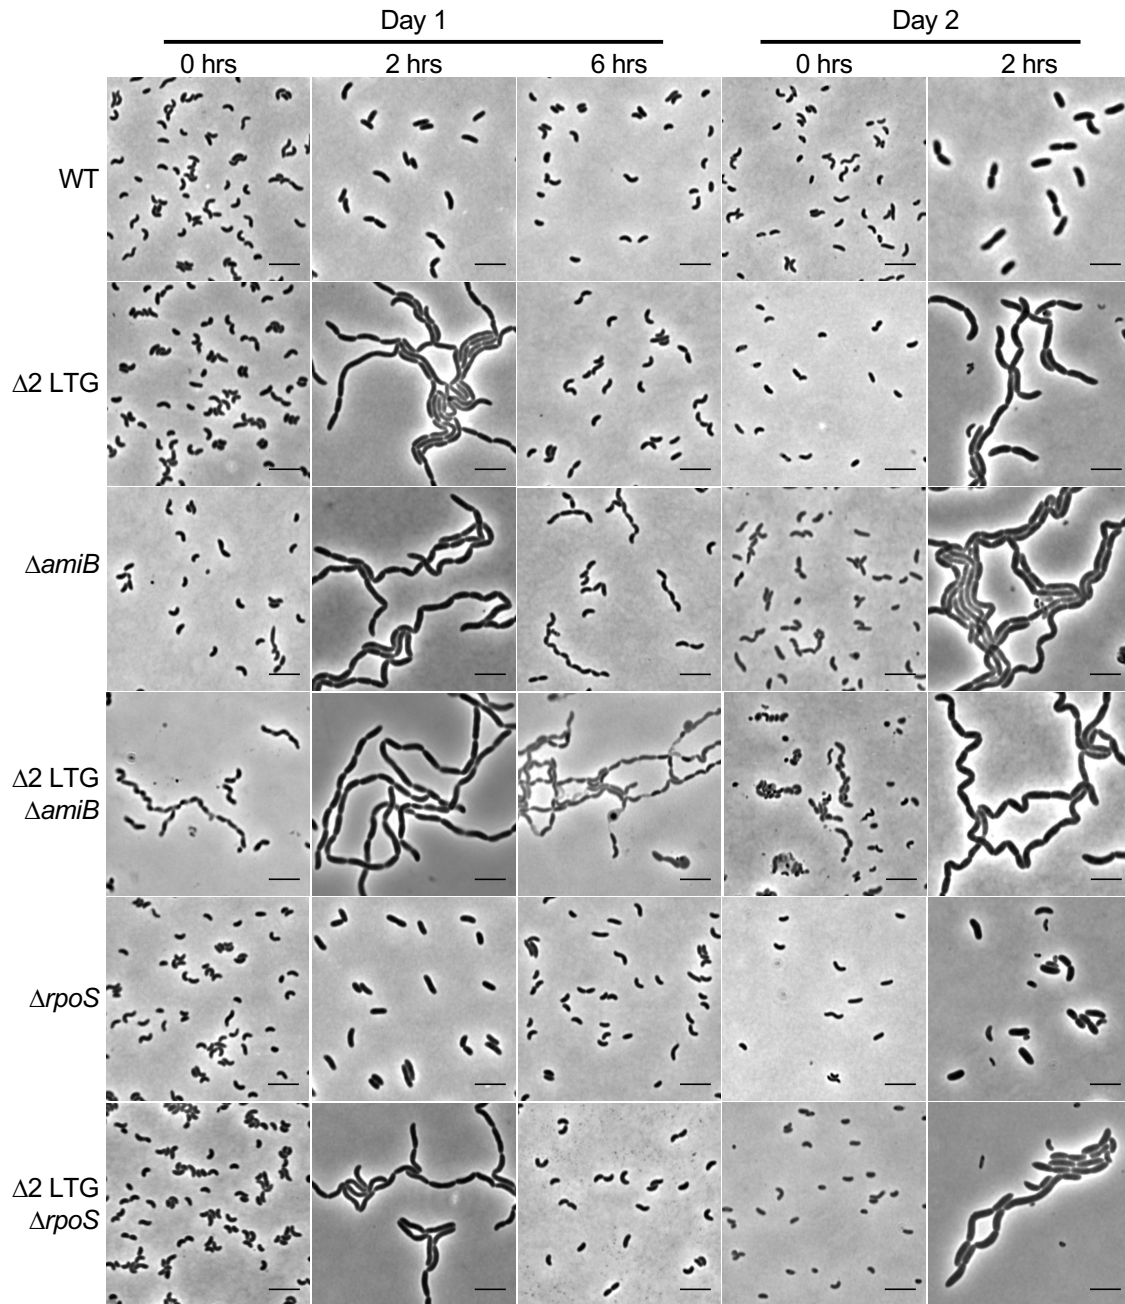

**Fig S5. Resolution of septal autolysin mutant chains is not due to spontaneous suppressors.**

Septal autolysin and  $\Delta rpoS$  mutants were grown in LB at 37°C for 24hrs, then back-diluted into LB at 37°C. Cultures were imaged on agarose pads. Scale bars = 5  $\mu$ m.

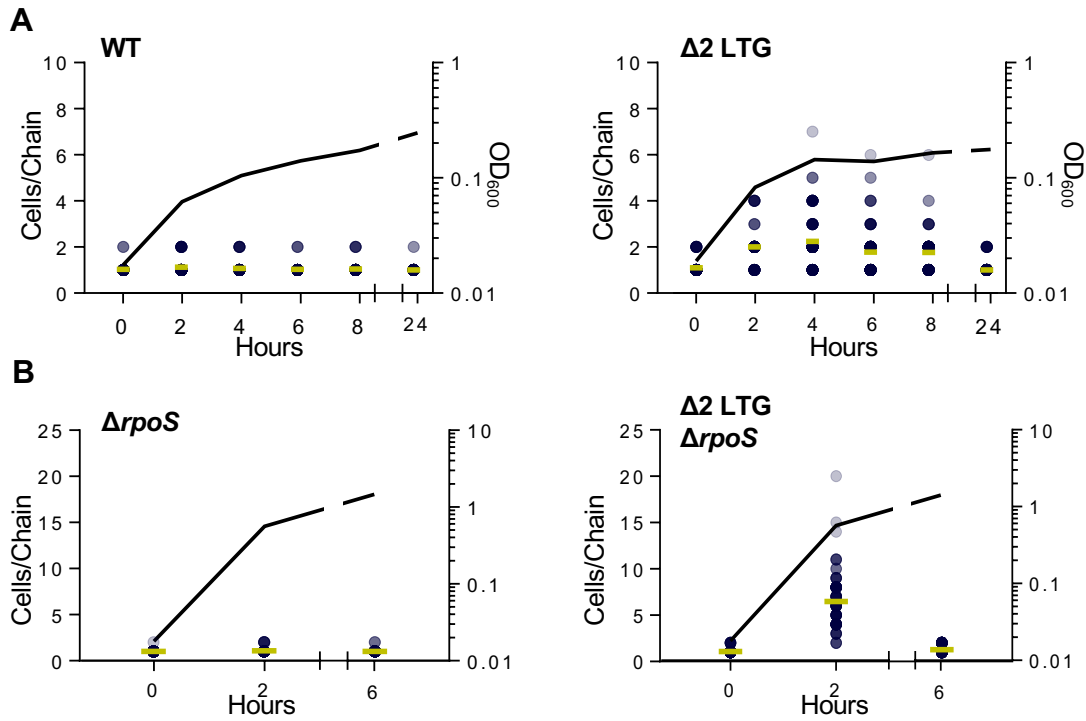

**FigS6. Factors secreted during stationary phase do not affect  $\Delta 2$  LTG chaining defect.**

**A)** WT and  $\Delta 2$  LTG were grown in the supernatant of an overnight WT LB culture at 37°C and imaged on agarose pads. Cells per chain were manually counted ( $n > 100$ ). Gold bar = median. **B)**  $\Delta rpoS$  and  $\Delta 2$  LTG  $\Delta rpoS$  were grown in LB at 37°C and imaged on agarose pads and analyzed as in Fig S5A.

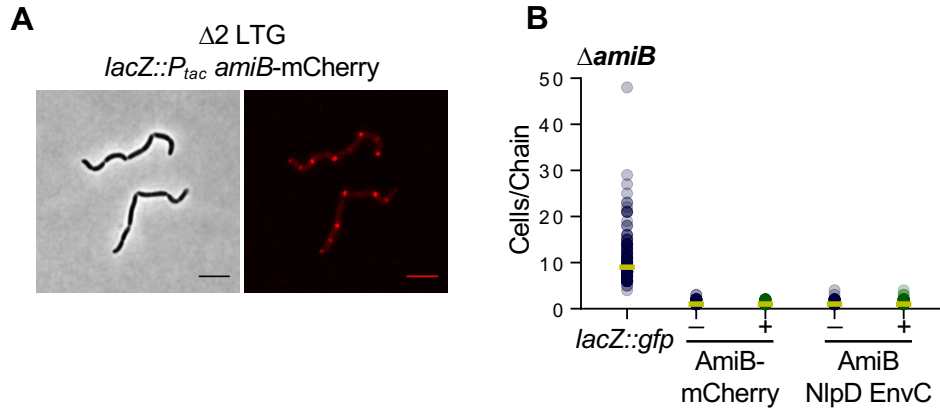

**Fig S7. Functional AmiB-mCherry localizes in  $\Delta 2$  LTG.**

**A)** Expression of  $P_{tac}$ : *amiB-mCherry* was induced with 1 mM IPTG in a  $\Delta$ *amiB* background, grown in LB at 37°C to  $\sim$ OD<sub>600</sub> 0.6, and imaged on agarose pads. Cells per chain were manually counted (n >100). Gold bar = median. **B)** Expression of  $P_{tac}$ : *amiB-mCherry* was induced with 1 mM IPTG in a  $\Delta 2$  LTG background, grown in LB at 37°C to  $\sim$ OD<sub>600</sub> 0.6, and imaged on agarose pads.

Scale bars = 5  $\mu$ m

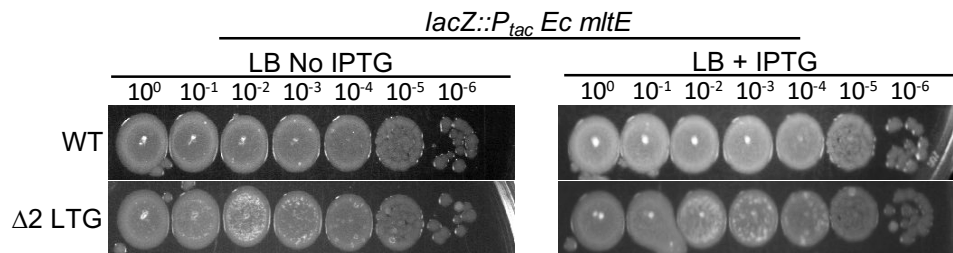

**Fig S8. MltE<sub>E. coli</sub> is not toxic to WT or  $\Delta 2$  LTG *V. cholerae*.**

**A)** Overnight cultures of  $P_{tac}$ : *mltE<sub>E. coli</sub>* in WT and  $\Delta 2$  LTG backgrounds were spot-plated in serial 10-fold dilutions onto LB +/- 1 mM IPTG and incubated overnight at 30°C.



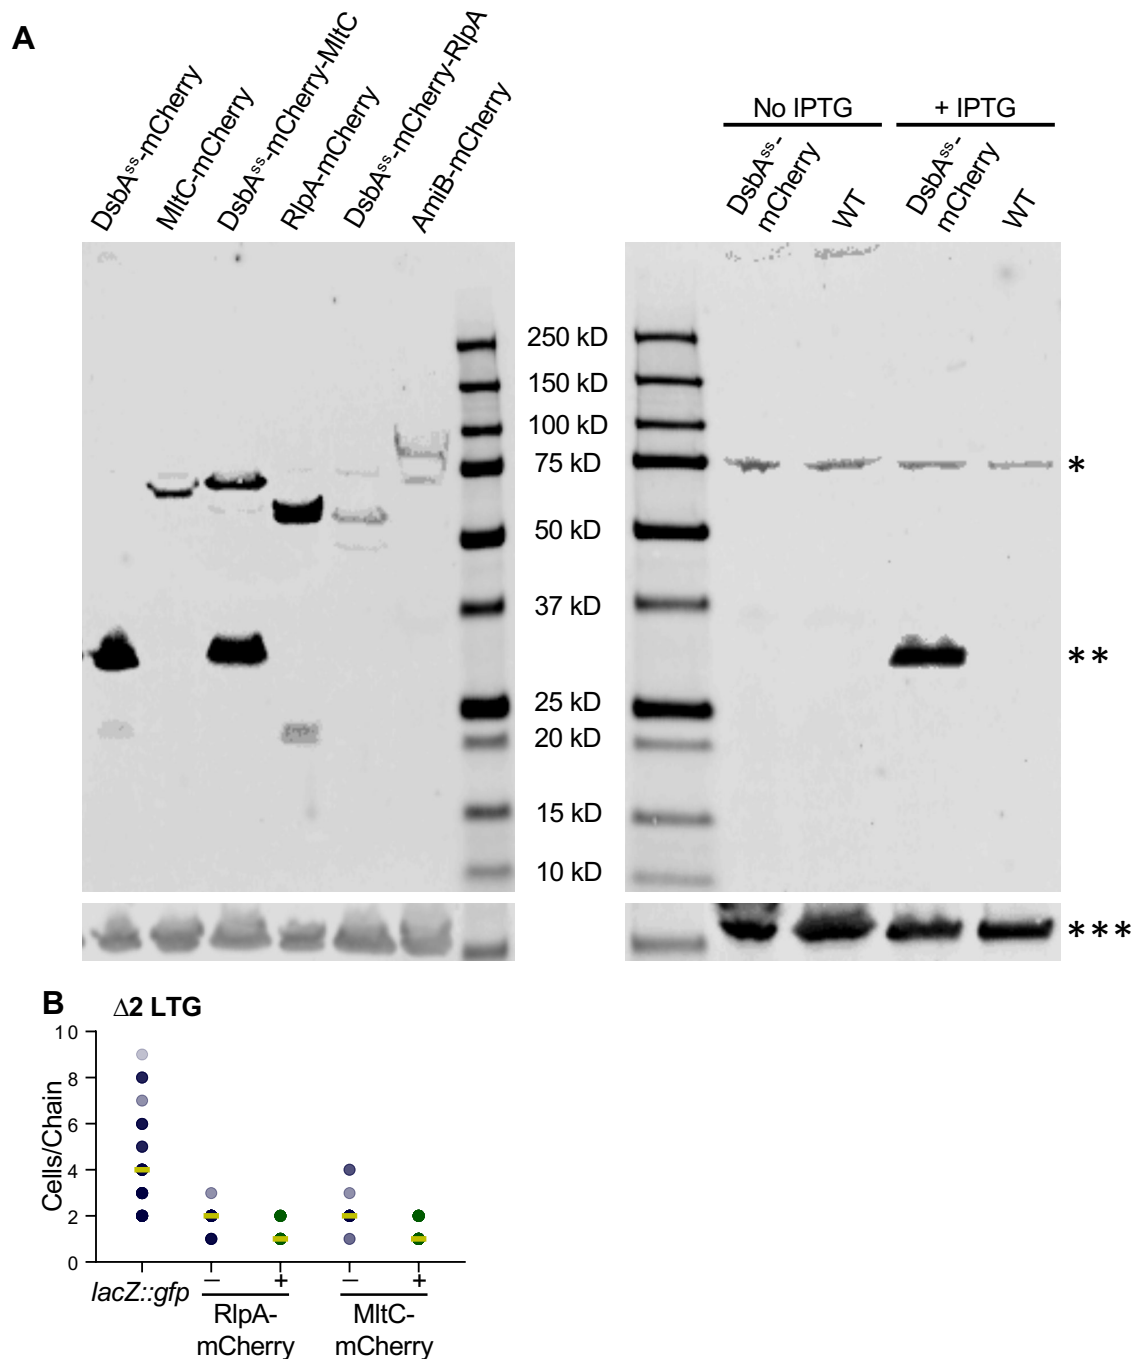

**Fig S9. Autolysin-mCherry fusions are functional.**

**A)** With the exception of AmiB-mCherry expressed from chromosomal  $P_{tac}$ , mCherry fusions were expressed from IPTG-inducible vector pHL100mob. Fusion protein expression was induced with 0.2% arabinose or 1 mM IPTG in a WT background grown in LB at 37°C and detected with Genetex polyclonal mCherry antibody. Loading control band detected with BioLegend monoclonal RpoA antibody. \*=non-specific crossreaction with mCherry antibody, \*\*=soluble mCherry, \*\*\*=RpoA.

**B)** Expression of chromosomal  $P_{tac}$ : *rlpA-mCherry* or *mltC-mCherry* was induced with 1 mM IPTG in a  $\Delta 2$  LTG background, grown in LB at 37°C to  $\sim OD_{600}$  0.6, and imaged on agarose pads.

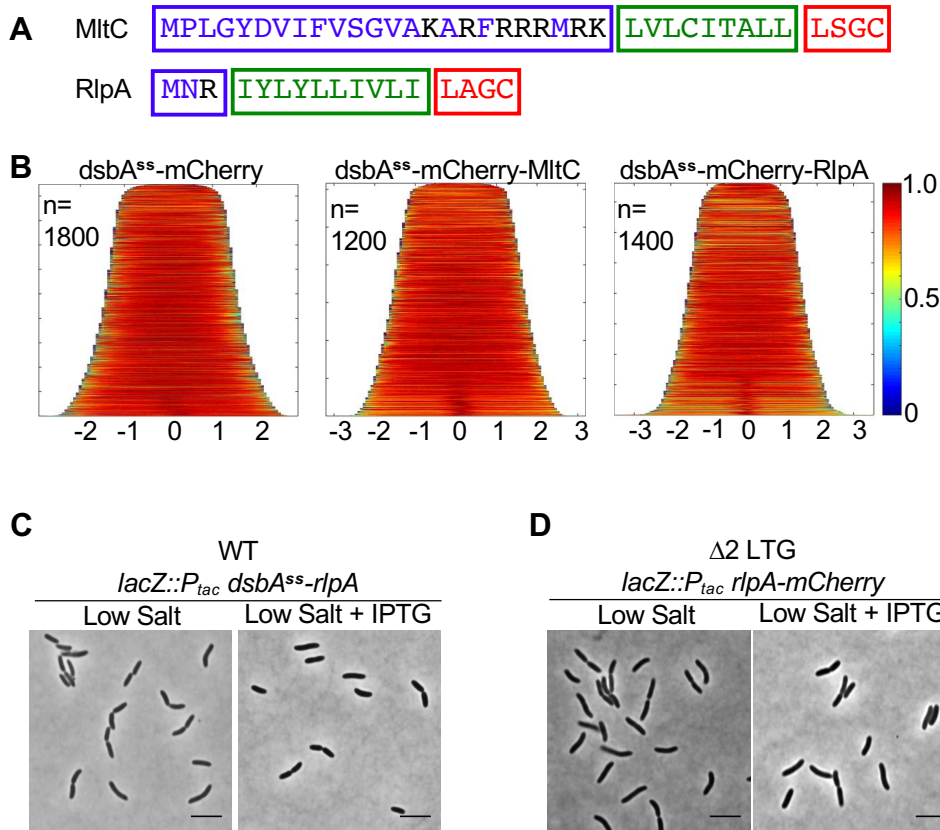

**Fig S10. RlpA and MltC can localize without lipidation.**

**A)** Outer membrane signal sequences and lipoboxes in LTG amino acid sequences were predicted by the DOLOP algorithm. **B)** WT carrying pHL100 *dsbA<sup>ss</sup>-mCherry-LTG $\Delta$ ss* was grown in M9 + 0.2% glucose/ kan50 at 30 °C, induced with 1mM IPTG after 2hrs, and imaged on agarose pads at  $OD_{600} \sim 0.15$ . Demographs of *mCherry* fusion localization generated with Oufiti. **C)** Expression of  $P_{tac}: dsbA^{ss}-rlpA_{[18-263]}$  was induced in a WT background with 1 mM IPTG, grown in low salt LB for 4 hrs, and imaged on agarose pads. **D)** Expression of  $P_{tac}: rlpA-mCherry$  was induced in a  $\Delta 2$  LTG background, grown in low salt LB for 4 hrs, and imaged on agarose pads.

**Table S1. V. cholerae strains**

| <b>Strain</b> | <b>Description</b>                                                                                                    | <b>Source or reference</b> |
|---------------|-----------------------------------------------------------------------------------------------------------------------|----------------------------|
| N16961        | Wild-type V. cholerae El Tor strain                                                                                   | Heidelberg, et. al., 2000  |
| AW388         | pHL100 mltC-mCherry, pBAD33 yfp-ftsZ                                                                                  | This study                 |
| AW390         | $\Delta$ mltC, rlpA::stop (denoted as $\Delta$ 2 LTG)                                                                 | This study                 |
| AW414         | $\Delta$ mltC                                                                                                         | This study                 |
| AW431         | rlpA::stop                                                                                                            | This study                 |
| AW452         | $\Delta$ mltA, $\Delta$ mltB, $\Delta$ mltC, $\Delta$ mltD, $\Delta$ mltF, $\Delta$ slt70 (denoted as $\Delta$ 6 LTG) | This study                 |
| AW460         | pHL100 rlpA-mCherry                                                                                                   | This study                 |
| AW465         | pHL100 rlpA-mCherry, pBAD33 yfp-ftsZ                                                                                  | This study                 |
| AW482         | $\Delta$ amiB                                                                                                         | This study                 |
| AW487         | <i>lacZ::GFP</i>                                                                                                      | This study                 |
| AW488         | $\Delta$ mltC, rlpA::stop, <i>lacZ::GFP</i>                                                                           | This study                 |
| AW581         | $\Delta$ rpoS<>kan                                                                                                    | This study                 |
| AW582         | $\Delta$ mltC, rlpA::stop, $\Delta$ rpoS<>kan                                                                         | This study                 |
| AW597         | <i>lacZ::P<sub>tac</sub>yfp-ftsN</i> , pHL100 rlpA-mCherry                                                            | This study                 |
| AW598         | <i>lacZ::P<sub>tac</sub>yfp-ftsN</i> , pHL100 mltC-mCherry                                                            | This study                 |
| AW607         | $\Delta$ mltC, rlpA::stop, <i>lacZ::P<sub>tac</sub>shyC</i>                                                           | This study                 |
| AW615         | $\Delta$ mltC, rlpA::stop, <i>lacZ::P<sub>tac</sub>shyA</i>                                                           | This study                 |
| AW634         | <i>mltG::stop</i>                                                                                                     | This study                 |
| AW636         | $\Delta$ mltC, rlpA::stop, <i>lacZ::P<sub>tac</sub> rlpA-mCherry</i>                                                  | This study                 |
| AW639         | $\Delta$ mltC, rlpA::stop, <i>lacZ::P<sub>tac</sub> mltC-mCherry</i>                                                  | This study                 |
| AW664         | <i>lacZ::P<sub>tac</sub> amiB-mCherry</i>                                                                             | This study                 |
| AW665         | $\Delta$ mltC, rlpA::stop, <i>lacZ::P<sub>tac</sub> amiB-mCherry</i>                                                  | This study                 |
| AW666         | $\Delta$ amiB, <i>lacZ::P<sub>tac</sub> amiB-mCherry</i>                                                              | This study                 |
| AW679         | $\Delta$ mltC, rlpA::stop, <i>lacZ::P<sub>tac</sub> dsbA<sup>ss</sup>-mCherry</i>                                     | This study                 |
| AW683         | <i>lacZ::P<sub>tac</sub> Ec mltE</i>                                                                                  | This study                 |
| AW684         | $\Delta$ mltC, rlpA::stop, <i>lacZ::P<sub>tac</sub> Ec mltE</i>                                                       | This study                 |
| AW708         | $\Delta$ mltA, $\Delta$ mltB, $\Delta$ mltC, $\Delta$ mltD, $\Delta$ mltF, $\Delta$ slt70, P <sub>ara</sub> rlpA      | This study                 |
| AW717         | $\Delta$ mltC, rlpA::stop, <i>lacZ::P<sub>tac</sub> amiB nlpD envC</i>                                                | This study                 |
| AW719         | $\Delta$ mltC, rlpA::stop, $\Delta$ amiB                                                                              | This study                 |
| AW722         | $\Delta$ amiB, <i>lacZ::P<sub>tac</sub> amiB nlpD envC</i>                                                            | This study                 |
| AW733         | pHL100mob dsbA <sup>ss</sup> -mCherry                                                                                 | This study                 |
| AW734         | pHL100mob dsbA <sup>ss</sup> -mCherry-mltC                                                                            | This study                 |
| AW735         | pHL100mob dsbA <sup>ss</sup> -mCherry-rlpA                                                                            | This study                 |
| AW736         | pHL100 mltC-mCherry                                                                                                   | This study                 |
| AW756         | $\Delta$ mltC, rlpA::stop, <i>lacZ::P<sub>tac</sub> dsbA<sup>ss</sup>-mltC</i>                                        | This study                 |
| AW757         | <i>lacZ::P<sub>tac</sub> dsbA<sup>ss</sup>-rlpA</i>                                                                   | This study                 |
| AW758         | $\Delta$ mltC, rlpA::stop, <i>lacZ::P<sub>tac</sub> dsbA<sup>ss</sup>-rlpA</i>                                        | This study                 |
| AW771         | $\Delta$ mltD $\Delta$ mltA                                                                                           | This study                 |
| AW772         | $\Delta$ mltD $\Delta$ mltA $\Delta$ mltC                                                                             | This study                 |
| AW773         | $\Delta$ mltC $\Delta$ mltD                                                                                           | This study                 |

**Table S2. E. coli strains**

| <b>Strain</b> | <b>Description</b>                                       | <b>Source or reference</b> |
|---------------|----------------------------------------------------------|----------------------------|
| MG1655        | <i>E. coli K-12 strain</i>                               | Blattner, et. al., 1997    |
| AW650         | $\Delta$ rlpA, $\Delta$ mltC                             | This study                 |
| AW656         | $\Delta$ rlpA, $\Delta$ mltC, $\Delta$ mltE<>FRT-cat-FRT | This study                 |

**Table S3. Plasmids**

| Plasmid Description |                                                 | Source or reference    | Relevant Primers                      |
|---------------------|-------------------------------------------------|------------------------|---------------------------------------|
|                     | pBAD33 yfp-ftsZ                                 | Gift from Waldor lab   |                                       |
|                     | pBAD33 yfp-ftsN                                 | Gift from Waldor lab   |                                       |
| pAW32               | pHL100 mltC-mCherry                             | This study             | TDP206/TDP208, TDP765/TDP766          |
| pAW33               | pHL100 rlpA-mCherry                             | This study             | TDP1164/TDP1167, TDP765/TDP766        |
| pJLZ111             | pCVD442 lacZ::gfp                               | Ritchie, et. al., 2010 |                                       |
| pAW34               | pTD101 yfp-ftsN                                 | This study             | AIW306/pHL revB                       |
| pAW35               | pTD101 shyC                                     | This study             | AIW329/AIW330                         |
| pAW36               | pTD101 shyA                                     | This study             | AIW327/AIW328                         |
| pAM321              | pDS132 ΔamiB                                    | Möll, et. al., 2014    |                                       |
| pAW37               | pCVD442 ΔmltA                                   | This study             | TDP1199/TDP1200, TDP1201/TDP1202      |
| pAW38               | pCVD442 ΔmltB                                   | This study             | TDP1203/TDP1204, TDP1205/TDP1206      |
| pAW39               | pCVD442 ΔmltC                                   | This study             | DLP42/DLP43, DLP137/DLP138            |
| pAW40               | pCVD442 ΔmltD                                   | This study             | TDP1211/TDP1212, TDP1213/TDP1214      |
| pAW41               | pCVD442 ΔmltF                                   | This study             | TDP1258/TDP1257, TDP1255/TDP1256      |
| pAW42               | pCVD442 Δslt70                                  | This study             | TDP1215/TDP1216, TDP1217/TDP1218      |
| pAW43               | pCVD442 rlpA::stop                              | This study             | DLP48/TDP210, TDP211/DLP51            |
| pAW44               | pCVD442 mltG::stop                              | This study             | TDP1251/TDP826, TDP827/TDP1254        |
| pAW45               | pAM299 rlpA                                     | This study             | DLP186/DLP187                         |
| pAW46               | pTD101 rlpA-mCherry                             | This study             | AIW356/pHLrevB                        |
| pAW47               | pTD101 mltC-mCherry                             | This study             | AIW264/pHLrevB                        |
| pAW48               | pTD101 amiB-mCherry                             | This study             | AIW265/AIW250, AIW251/AIW252          |
| pAW49               | <i>pTD101 dsbA<sup>ss</sup>-mCherry</i>         | This study             | AIWGB4, AIW251/AIW346                 |
| pAW50               | pTD101 Ec mltE                                  | This study             | BR02/AIW380                           |
| pAW51               | pTD101 amiB nlpD envC                           | This study             | AIW265/AIW257, AIW255/256, AIW258/259 |
| pAW52               | <i>pHL100mob dsbA<sup>ss</sup>-mCherry</i>      | This study             | AIWGB4, AIW251/AIW346                 |
| pAW53               | <i>pHL100mob dsbA<sup>ss</sup>-mCherry-mltC</i> | This study             | AIWGB4, AIW343/AIW344                 |
| pAW54               | <i>pHL100mob dsbA<sup>ss</sup>-mCherry-rlpA</i> | This study             | AIWGB4, AIW347/AIW348                 |
| pAW55               | <i>pTD101 dsbA<sup>ss</sup>-mltC</i>            | This study             | AIW343/AIW389                         |
| pAW56               | <i>pTD101 dsbA<sup>ss</sup>-rlpA</i>            | This study             | AIW347/AIW391                         |

**Table S3. Plasmids (continued)**

| <b>Plasmid Description</b> |                                                                 | <b>Source or reference</b>       | <b>Relevant Primers</b> |
|----------------------------|-----------------------------------------------------------------|----------------------------------|-------------------------|
| pKM208                     | P <sub>tac</sub> λ Red, ampR, Rep <sup>ts</sup>                 | Murphy and Campellone, 2003      |                         |
| pKD3                       | <i>FRT-cat-FRT</i>                                              | Datsenko and Wanner, 2000        |                         |
| pKD4                       | <i>FRT-kan-FRT</i>                                              | Datsenko and Wanner, 2000        |                         |
| pCP20                      | FLP+, λ cl857+, λP <sub>R</sub> , Rep <sup>ts</sup> , ampR, cmR | Cherepanov and Wackernagel, 1995 |                         |
| pJZ111                     | <i>lacZ::gfp</i>                                                | Ritchie, et. al., 2010           |                         |
